# Supplementary material for: L1 increases adhesion-mediated proliferation and chemoresistance of retinoblastoma
Source: PubMed Central journal article supplement (PMC5362498; doi:10.18632/oncotarget.14487), 2017-01-04
Supplement: oncotarget-08-15441-s001.pdf [file oncotarget-08-15441-s001.pdf]

## L1 increases adhesion-mediated proliferation and chemoresistance of retinoblastoma

### SUPPLEMENTARY FIGURES AND TABLES

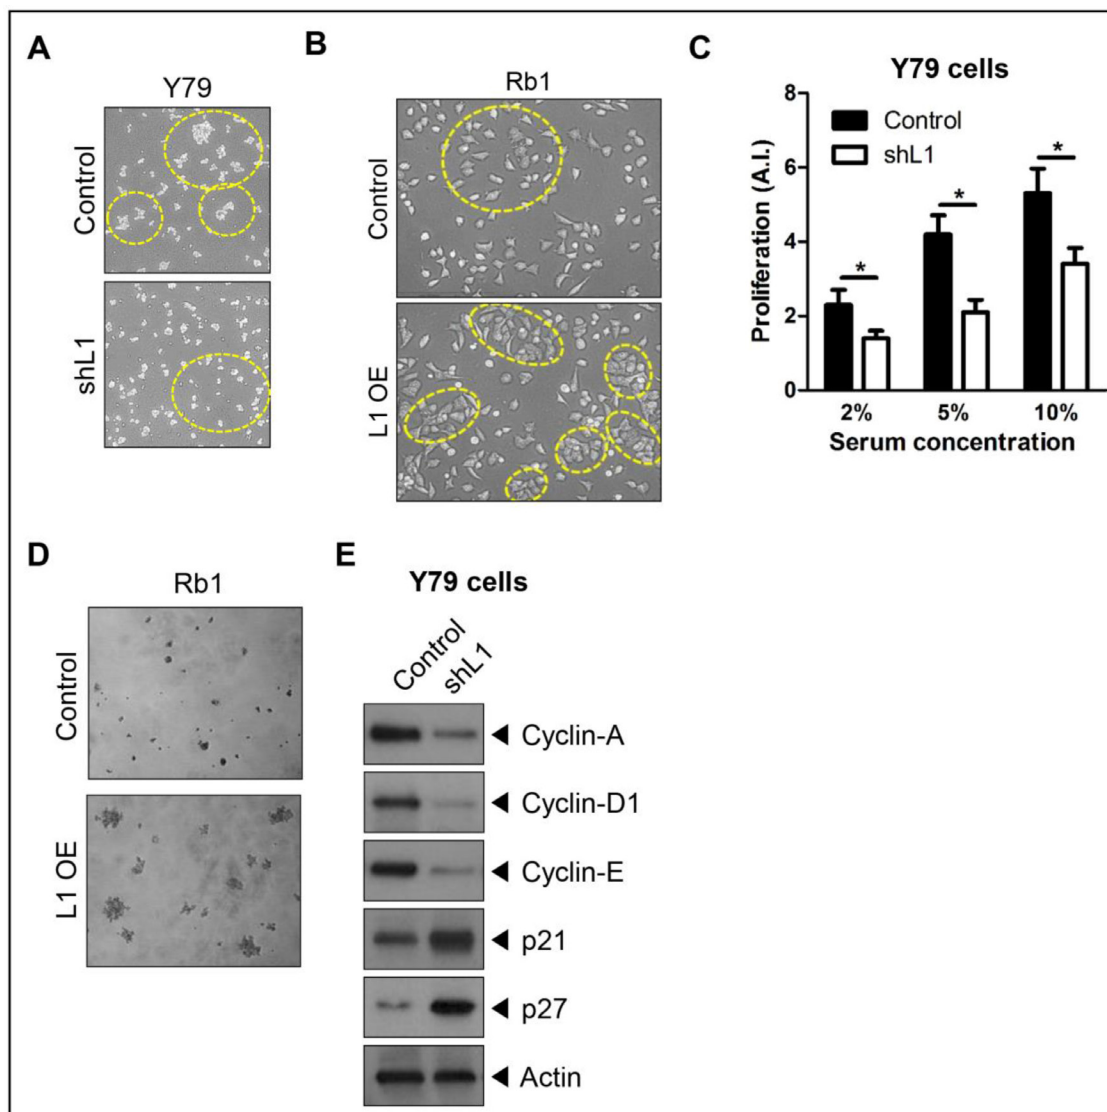

**Supplementary Figure 1: L1 increases proliferation of retinoblastoma cells.** **A and B.** The morphology of control and L1-depleted Y79 cells (A) or control and L1-overexpressing SNUOT-Rb1 cells (B) at day 2 after thawing using phase contrast microscopy. Dashed yellow circles indicate the clusters of cohesively adherent cells. **C.** The degree of proliferation of control and L1-depleted Y79 cells with different concentrations of serum. **D.** Representative images of anchorage-independent cell growth of control and L1-overexpressing SNUOT-Rb1 cells in soft agar. **E.** The expression of proteins associated with cell cycle in control and L1-depleted Y79 cells on Western blot analyses. Control, Y79 or SNUOT-Rb1 cells; L1 OE, SNUOT-Rb1 cells transfected with a lentiviral vector containing full length L1; shL1, Y79 cells transfected with L1-specific shRNA. Bars, SEM. \*,  $P < 0.05$  (Mann-Whitney U-test).

| Grade | Response to treatment | Specific features                                                           | Photo                                                                              |                                                                                     |                                                                                     |
|-------|-----------------------|-----------------------------------------------------------------------------|------------------------------------------------------------------------------------|-------------------------------------------------------------------------------------|-------------------------------------------------------------------------------------|
| 0     | +++                   | No evidence of tumor                                                        | 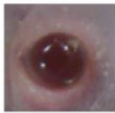 |  |  |
| 1     | ++                    | Vitreous: clear<br>Tumor: streak-like                                       |  |  |  |
| 2     | +                     | Vitreous: clear to hazy<br>Tumor: plaque-like                               |  |  |  |
| 3     | +/-                   | Vitreous: hazy<br>Tumor: mass-like                                          |  |  |  |
| 4(4+) | -                     | Vitreous: uncheckable<br>Tumor: full of vitreous;<br>globe enlargement (4+) |  |  |  |

Supplementary Figure 2: A visual grading system for the *in vivo* orthotopic transplantation model of retinoblastoma in mice.

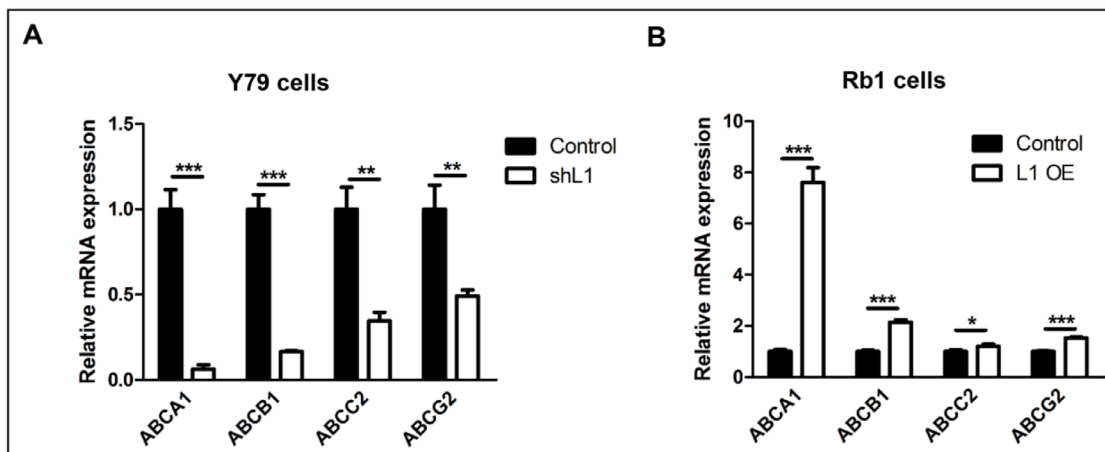

**Supplementary Figure 3: L1 increases expression of genes related with MDR.** A and B. The relative expression of *ABCA1*, *ABCB1*, *ABCC2*, and *ABCG2* in control and L1-depleted Y79 cells (A) or control and L1-overexpressing SNUOT-Rb1 cells (B) on qRT-PCR. Control, Y79 or SNUOT-Rb1 cells; shL1, Y79 cells transfected with L1-specific shRNA; L1 OE, SNUOT-Rb1 cells transfected with a lentiviral vector containing full length L1. Bars, SEM. \*,  $P < 0.05$ ; \*\*\*,  $P < 0.001$ ; NS,  $P > 0.05$  (Unpaired T-test).

**Supplementary Table 1: The demographic and clinical characteristics of 30 retinoblastoma patients and tumors in this study**

|                                |           |
|--------------------------------|-----------|
| Age at diagnosis (months)      | 23 ± 17   |
| Female (n, %)                  | 13, 43    |
| Bilateral (n, %)               | 3, 10     |
| ICR classification             |           |
| Group D                        | 11        |
| Group E                        | 19        |
| Reese-Ellsworth classification |           |
| Group 5A                       | 29        |
| Group 5B                       | 1         |
| Tumor size                     |           |
| Longest diameter (cm)          | 1.6 ± 0.3 |
| Shortest diameter (cm)         | 1.0 ± 0.4 |

**Supplementary Table 2: Clinical characteristics of patients with chemoresistant retinoblastoma**

| Case # | Sex | Chemotherapy regimen                                                                                                                                                                                   |
|--------|-----|--------------------------------------------------------------------------------------------------------------------------------------------------------------------------------------------------------|
| 1      | F   | Cisplatin, etoposide, vincristine #3<br>Ifosfamide, etoposide, vincristine #10<br>Carboplatin, doxorubicin, etoposide #4                                                                               |
| 2      | M   | Carboplatin, doxorubicin, etoposide #4<br>Carboplatin, doxorubicin, etoposide, vincristine, cyclophosphamide #10<br>Carboplatin, ifosfamide, etoposide #4<br>Cyclophosphamide, etoposide, topotecan #1 |
| 3      | F   | Carboplatin, doxorubicin, etoposide, vincristine, cyclophosphamide #13                                                                                                                                 |
| 4      | M   | Carboplatin, doxorubicin, etoposide #2<br>Carboplatin, doxorubicin, etoposide, vincristine, cyclophosphamide #5                                                                                        |

#n, number of cycles of indicated chemotherapy regimens.
